# Supplementary material for: Single-vat single-cure grayscale digital light processing 3D printing of materials with large property difference and high stretchability
Source: PubMed Central journal article supplement (PMC9988868; doi:10.1038/s41467-023-36909-y), 2023-03-06
Supplement: 41467_2023_36909_MOESM3_ESM.pdf [file 41467_2023_36909_MOESM3_ESM.pdf]

File Name: Supplementary Movie 1

Description: g-DLP printed sample with continuous gradient.

File Name: Supplementary Movie 2

Description: Composite designed with sequential deformation.

File Name: Supplementary Movie 3

Description: Hydrodynamic performance of g-DLP printed heart valve.

File Name: Supplementary Movie 4

Description: g-DLP printed biomimetic fish fin structure.

File Name: Supplementary Movie 5

Description: g-DLP printed pufferfish.

File Name: Supplementary Movie 6

Description: g-DLP printed inflatable membranes.

File Name: Supplementary Movie 7

Description: g-DLP printed pneumatic actuators.

File Name: Supplementary Movie 8

Description: g-DLP printed tentacle actuator.
